# Supplementary material for: A bioactive calcium silicate nanowire-containing hydrogel for organoid formation and functionalization
Source: Royal Society of Chemistry journal article supplement (doi:10.1039/d4mh00228h), 2024-01-01
Supplement: d4mh00228h1.pdf [file d4mh00228h1.pdf]

## Supporting Information

### **A bioactive calcium silicate nanowires-containing hydrogel for organoid formation and functionalization**

**Wenping Ma,<sup>ab</sup> Yi Zheng,<sup>ab</sup> Guangzhen Yang,<sup>a</sup> Hongjian Zhang,<sup>ab</sup> Mingxia Lu,<sup>ab</sup>  
Hongshi Ma,<sup>ab</sup> Chengtie Wu<sup>\*ab</sup> and Hongxu Lu<sup>\*ab</sup>**

*<sup>a</sup> State Key Laboratory of High Performance Ceramics and Superfine Microstructure,  
Shanghai Institute of Ceramics, Chinese Academy of Sciences, Shanghai 200050, China.*

*\*E-mail: hongxu.lyu@mail.sic.ac.cn; chengtiewu@mail.sic.ac.cn.*

*<sup>b</sup> Center of Materials Science and Optoelectronics Engineering, University of Chinese  
Academy of Sciences, 19 Yuquan Road, Beijing 100049, China.*

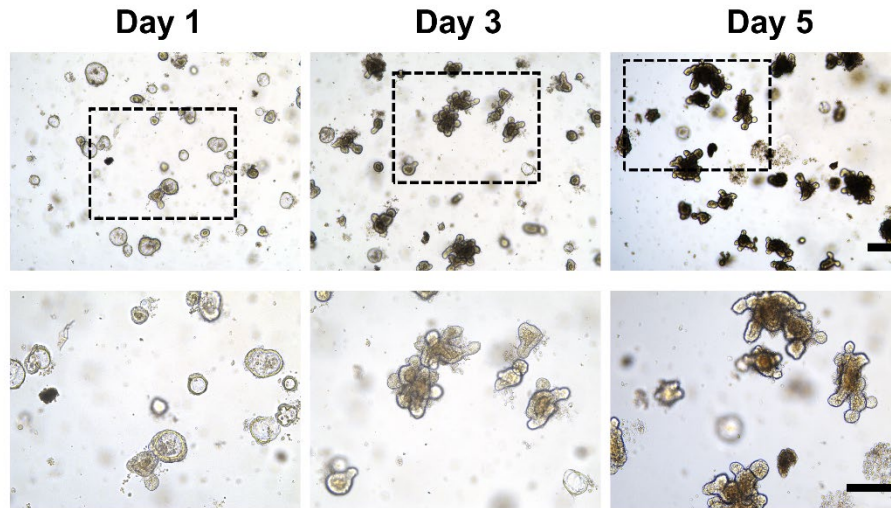

**Fig. S1** The developmental process of the intestinal organoids at different times. Scale bars: 250  $\mu$ m.

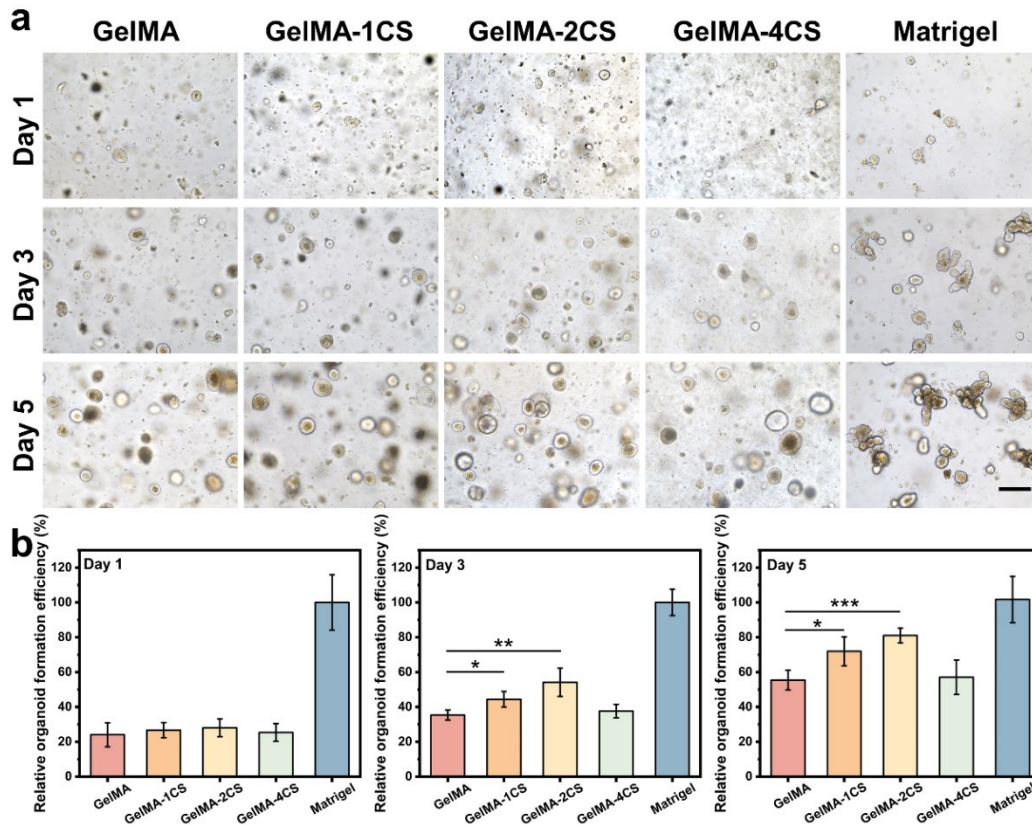

**Fig. S2** (a) The optical microphotographs of the intestinal organoids grown in the CS/GelMA hydrogel with different content of CS nanowires for 1, 3, and 5 days. Scale bars: 250  $\mu$ m. (b) Quantitative analysis of colony formation efficiency cultured in different CS/GelMA composite hydrogel for 1, 3, and 5 days (n=4). Data are presented as means  $\pm$  SD. \* $p$  < 0.05, \*\* $p$  < 0.01, \*\*\* $p$  < 0.001.

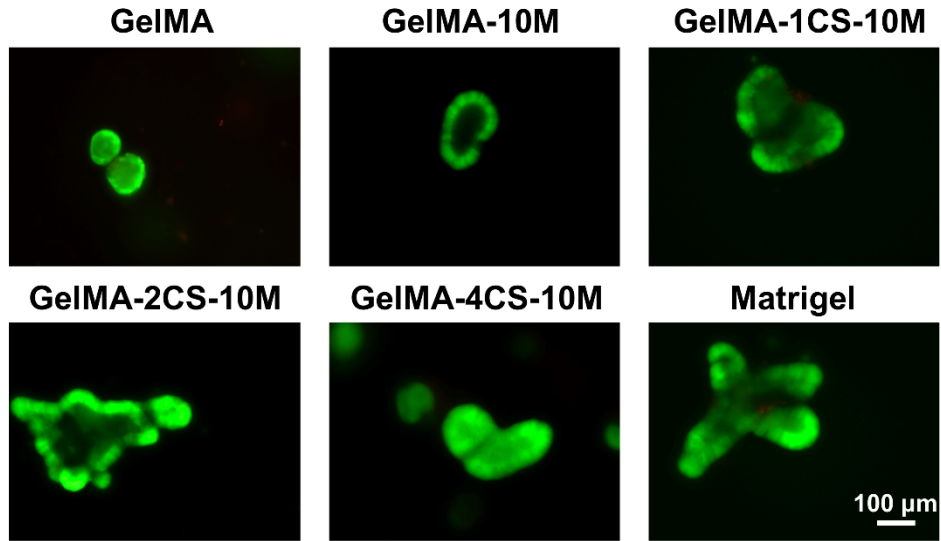

**Fig. S3** The live/dead staining of intestinal organoids grown in different hydrogels.

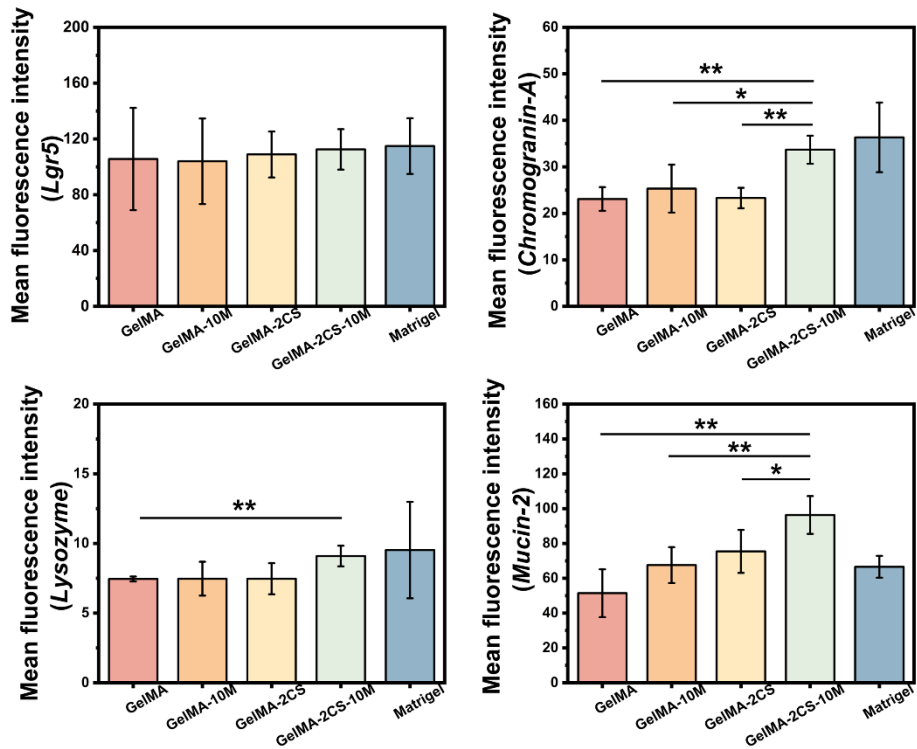

**Fig. S4** The mean fluorescence intensity of four differentiated cell type markers in intestinal organoids grown in different hydrogels. Data are presented as means  $\pm$  SD. \* $p < 0.05$ , \*\* $p < 0.01$ .

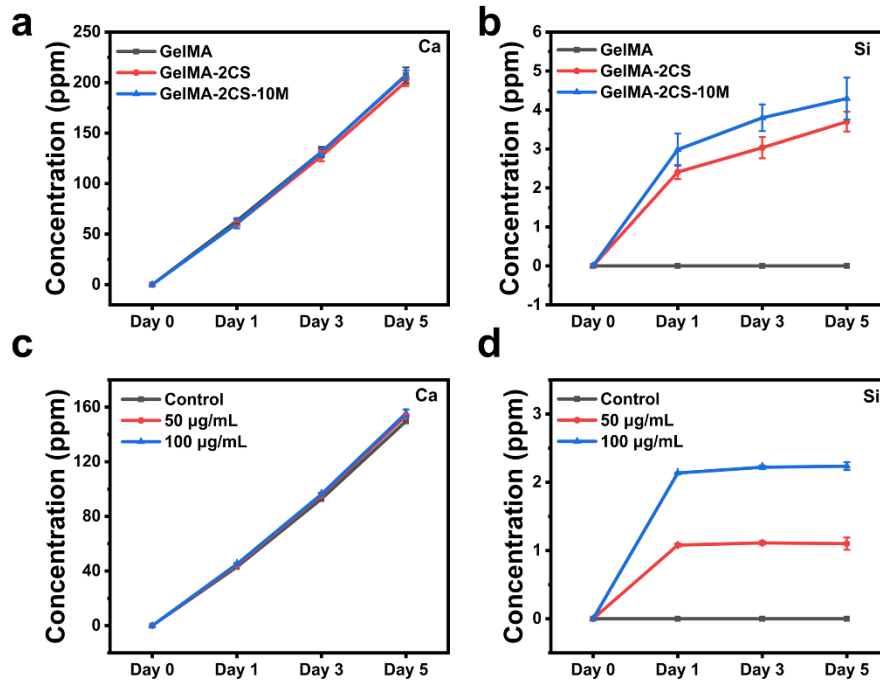

**Fig. S5** The ions release of CS/GelMA hydrogel (a, b) and CS nanowires (c, d) soaked in DMEM/F12 medium for 1, 3, and 5 days, respectively.

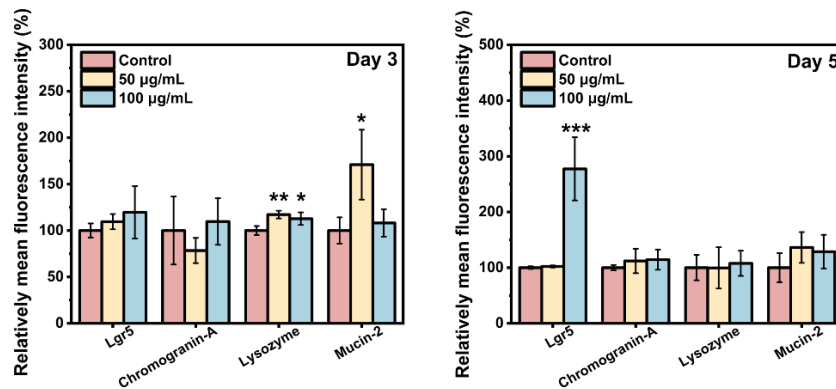

**Fig. S6** The relatively mean fluorescence intensity of four differentiated cell types markers in intestinal organoids treated with 0, 50 µg/mL, and 100 µg/mL CS nanowires for 3 and 5 days. Data are presented as means ± SD. \* $p < 0.05$ , \*\* $p < 0.01$ , \*\*\* $p < 0.001$ .

**Table S1** Primer sequences for RT-qPCR.

| Gene             | Primer sequence       |
|------------------|-----------------------|
| Lgr5 F           | ATTCGGTGCATTAGCTTGG   |
| Lgr5 R           | CGAACACCTGCGTGAATATG  |
| Chromogranin-A F | AAGGTGATGAAGTGCCTCCT  |
| Chromogranin-A R | GGTGTTCGCAGGATAGAGAGG |

|            |                          |
|------------|--------------------------|
| Lysozyme F | GTCACACTTCCTCGCTTTCC     |
| Lysozyme R | TGGCTTTGCTGACTGACAAG     |
| Mucin-2 F  | CCGACTTCAACCCAAGTGAT     |
| Mucin-2 R  | GAGCAAGGGACTCTGGTCTG     |
| GAPDH F    | GATTTGGTCGTATTGGGCG      |
| GAPDH R    | CTGGAAGATGGTGATGG        |
| ALB F      | GCATTGGTCTCATCTGTCCG     |
| ALB R      | ATTGGGGAATGTCTGGCTCA     |
| KRT19 F    | TGACCTGGAGATGCAGATTG     |
| KRT19 R    | CCTCAGGGCAGTAATTCCTC     |
| CYP3A11 F  | GGATGAGATCGATGAGGCTCTG   |
| CYP3A11 R  | CAGGTATTCCATCTCCATCACAGT |
| SOX9 F     | AGGAAGCTGGCAGACCAGTA     |
| SOX9 R     | CGTTCTTCACCGACTTCCTC     |
| HNF4a F    | AGCCGACAATGTGTGGTAGA     |
| HNF4a R    | CTTCCTTCTTCATGCCAGCC     |
| GAPDH F    | CACTGCCACCCAGAAGACTGT    |
| GAPDH R    | GGAAGGCCATGCCAGTGA       |

**Table S2** Primer sequences for RT-qPCR.

| Gene         | Primer sequence       |
|--------------|-----------------------|
| Wnt3 F       | CTCGCTGGCTACCCAATTTG  |
| Wnt3 R       | CTTCACACCTTCTGCTACGCT |
| LRP6 F       | GCGAAGACCACAGCGATGAA  |
| LRP6 R       | TTGTCCTGGCAGTTCGCATC  |
| R-spondin1 F | TGTGAAATGAGCGAGTGGTCC |
| R-spondin1 R | TCTCCCAGATGCTCCAGTTCT |
| R-spondin2 F | TTGCATAGAGGCCGCTGCTTT |
| R-spondin2 R | CTGGTCAGAGGATCAGGAATG |
| R-spondin3 F | GTACACTGTGAGGCCAGTGAA |
| R-spondin3 R | ATGGCTAGAACACCTGTCCTG |
| GAPDH F      | ATGGTGAAGGTTCGGTGTGAA |
| GAPDH R      | TGGAAGATGGTGATGGGCTT  |
